# Supplementary material for: Design and synthesis of periodic mesoporous organosilica materials with a multi-compartment structure
Source: Royal Society of Chemistry journal article supplement (doi:10.1039/c5ra16497d), 2015-01-01
Supplement: c5ra16497d5.pdf [file c5ra16497d5.pdf]

## Supporting Information for

### **Design and synthesis of periodic mesoporous organosilica materials with a multi-compartment structure**

C. X. (Cynthia) Lin,<sup>1</sup> S. Jambhrunkar,<sup>1</sup> P. Yuan,<sup>2</sup> C. H. Zhou,<sup>3</sup> and X. S. Zhao<sup>4\*</sup>

<sup>1</sup> Australian Institute for Bioengineering and Nanotechnology, The University of Queensland, Brisbane, QLD 4072, Australia

<sup>2</sup> State Key Laboratory of Heavy Oil Processing, China University of Petroleum, Beijing 102249, China

<sup>3</sup> College of Chemical Engineering, Zhejiang University of Technology, Hangzhou, Zhejiang 310014, China

<sup>4</sup> School of Chemical Engineering, The University of Queensland, St. Lucia, Brisbane, QLD 4072, Australia

\*[george.zhao@uq.edu.au](mailto:george.zhao@uq.edu.au)

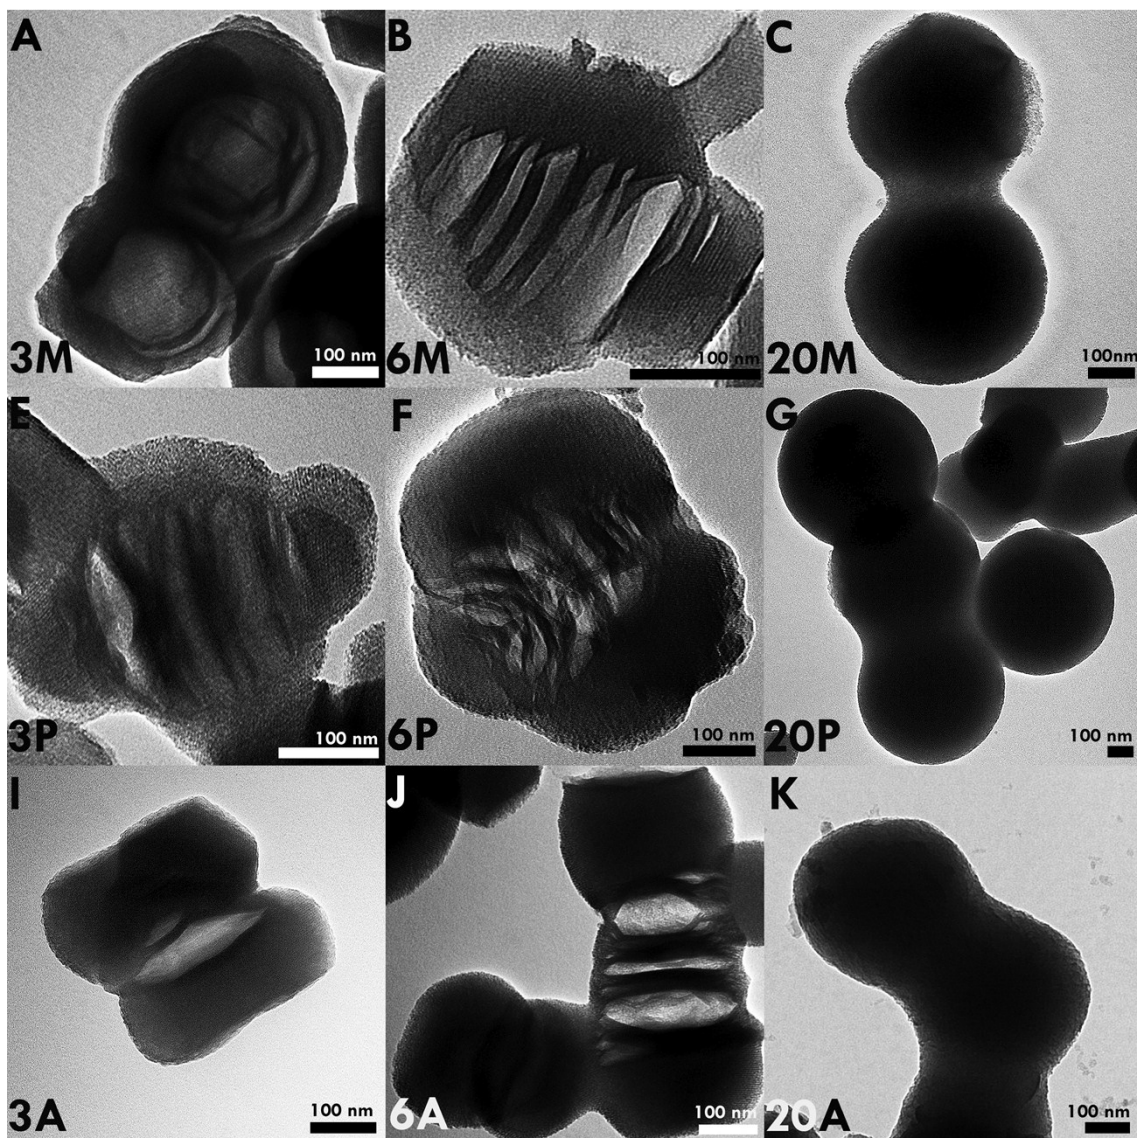

**Figure S1.** TEM images of MCPMO samples with co-solvents methanol (A. 3M - B. 6M - C. 20M), propanol (E. 3P - F. 6P - G. 20P), and acetone (I. 3A - J. 6A - K. 20A)

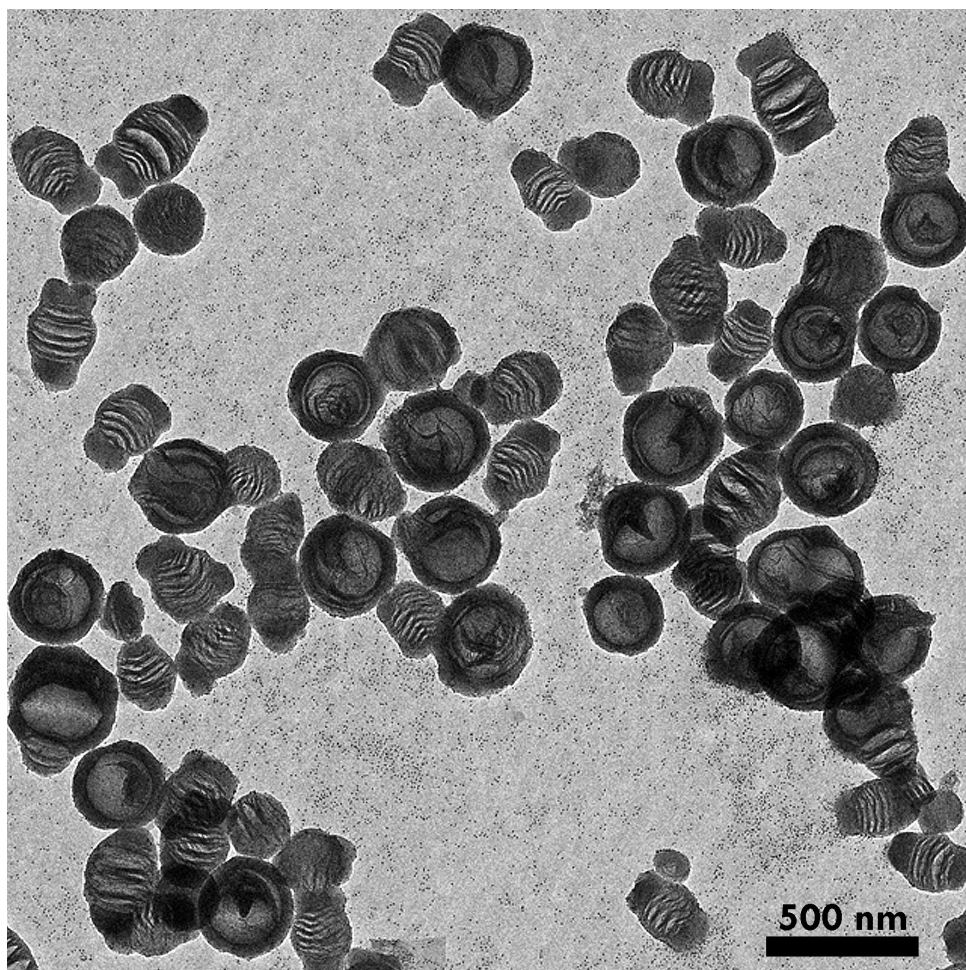

**Figure S2.** Low magnification TEM image of multi-compartment periodic mesoporous organosilica material

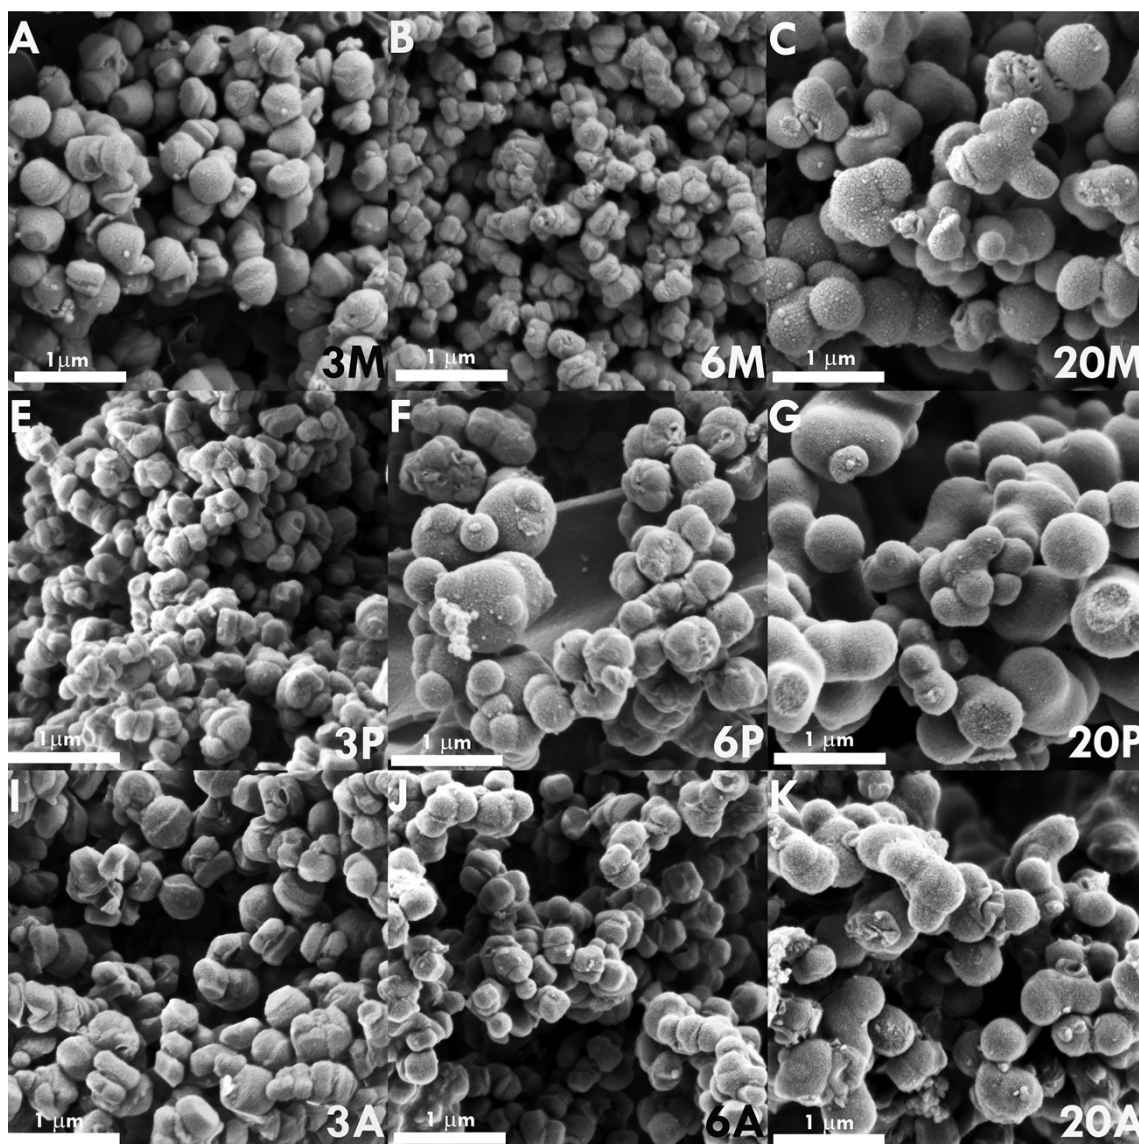

**Figure S3.** SEM images of MCPMO samples with co-solvents methanol (A. 3M - B. 6M - C. 20M), propanol (E. 3P - F. 6P - G. 20P, and acetone (I. 3A - J. 6A - K. 20A)

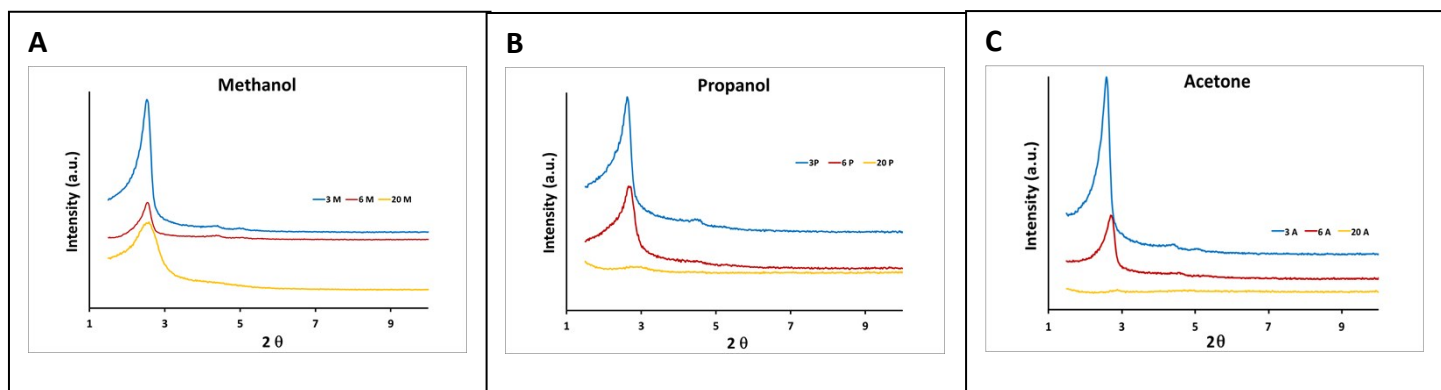

**Figure S4.** XRD patterns of MCPMO samples with different concentrations (3%, 6%, and 20%) of added co-solvents A) Methanol, B) Propanol, and C) Acetone.

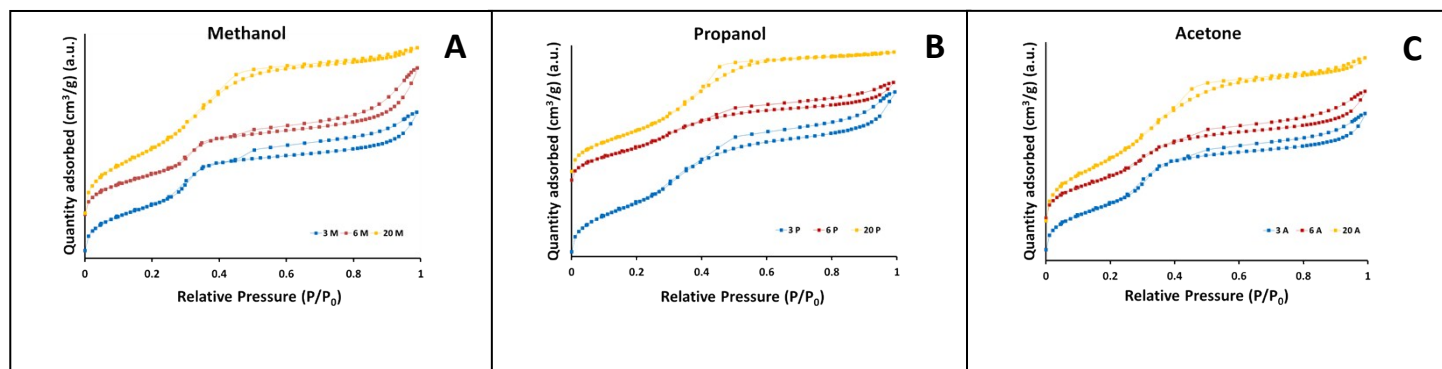

**Figure S5.** Nitrogen sorption isotherm of MCPMO samples with different concentrations (3%, 6%, and 20%) of added co-solvents A) Methanol, B) Propanol, and C) Acetone.

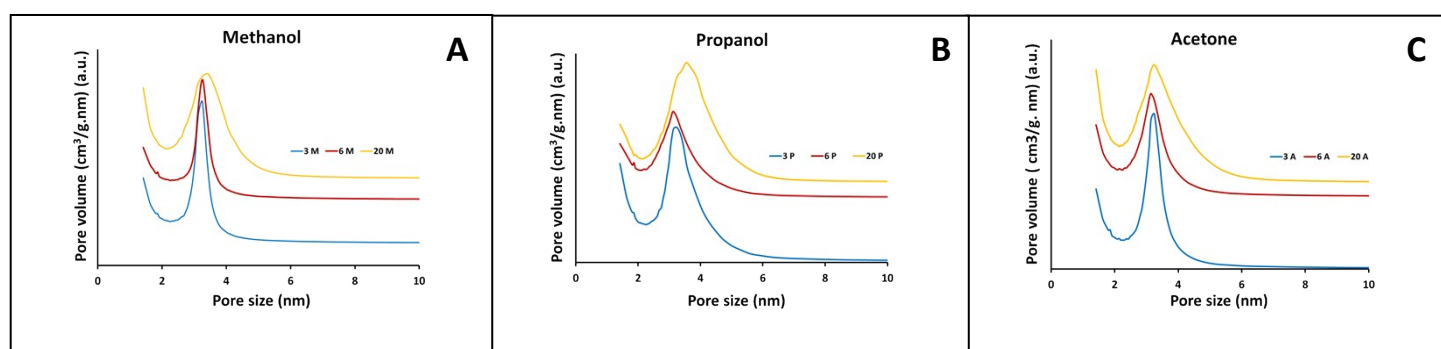

**Figure S6.** Pore size distribution of MCPMO samples with different concentrations (3%, 6%, and 20%) of added co-solvents A) Methanol, B) Propanol, and C) Acetone.

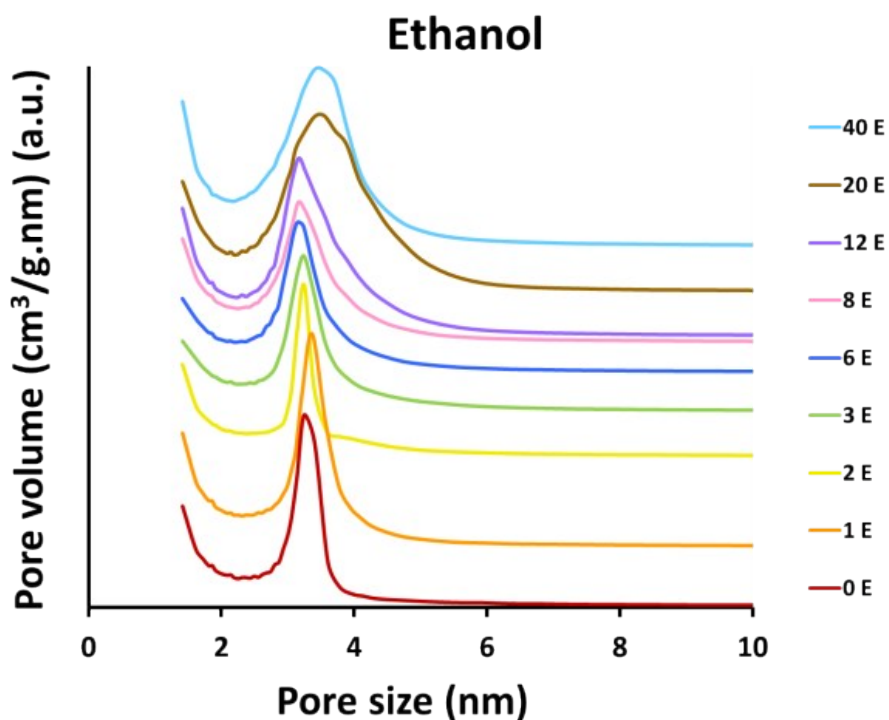

**Figure S7.** Pore size distribution of MCPMO samples (0E, 1E, 2E, 3E, 6E, 8E, 12E, 20E, and 40E)

**Table S1.** Physicochemical properties of MCPMO samples with varied concentrations of methanol, propanol, and acetone at (3%, 6%, and 20%)

| Sample | BET surface area (m <sup>2</sup> /g) | Pore volume (cm <sup>3</sup> /g) | Pore size (nm) | Particle size (nm) <sup>SEM</sup> | Vesicle size (nm) <sup>TEM</sup> |
|--------|--------------------------------------|----------------------------------|----------------|-----------------------------------|----------------------------------|
| 3M     | 734.6                                | 0.72                             | 3.30           | 350 - 400                         | 225x 225                         |
| 6 M    | 642.9                                | 0.76                             | 3.26           | 300 - 400                         | 30 x 125                         |
| 20 M   | 995.3                                | 0.86                             | 3.40           | 500 – 750                         | n/a                              |
| 3 P    | 842.3                                | 0.89                             | 3.27           | 350 - 450                         | 45 x 200                         |
| 6 P    | 573.6                                | 0.54                             | 3.12           | 300 - 800                         | 40 x 230                         |
| 20 P   | 693.9                                | 0.66                             | 3.54           | 600 - > 1000                      | n/a                              |
| 3 A    | 706.6                                | 0.68                             | 3.25           | 400 - 450                         | 50 x 200                         |
| 6 A    | 640.6                                | 0.62                             | 3.14           | 200 - 500                         | 30-60 x 220                      |
| 20 A   | 932.2                                | 0.82                             | 3.25           | 400 - 750                         | n/a                              |

**Table S2.** Physical properties and drug loading amount of selected MCPMO samples

| Sample                        | 0E                                                                                | 3 E                                                                                | 6 E                                                                                 |
|-------------------------------|-----------------------------------------------------------------------------------|------------------------------------------------------------------------------------|-------------------------------------------------------------------------------------|
| TEM                           | 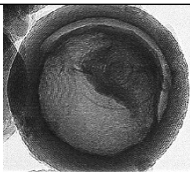 |  |  |
| Pore size (nm)                | 3.24                                                                              | 3.25                                                                               | 3.15                                                                                |
| After loading                 | 2.56                                                                              | 2.43                                                                               | 2.48                                                                                |
| Pore vol (cm <sup>3</sup> /g) | 0.82                                                                              | 0.78                                                                               | 0.70                                                                                |
| After loading                 | 0.49                                                                              | 0.36                                                                               | 0.37                                                                                |
| Surf Area (m <sup>2</sup> /g) | 698.3                                                                             | 699.5                                                                              | 743.7                                                                               |
| After loading                 | 542.4                                                                             | 309.8                                                                              | 415.6                                                                               |
| % drug loading                | 35.14                                                                             | 47.01                                                                              | 43.3                                                                                |
